# Supplementary material for: Distinct Subcortical Volume Alterations in Pediatric and Adult OCD: A Worldwide Meta- and Mega-Analysis
Source: Atypon-hosted journal article supplement (doi:10.1176/appi.ajp.2016.16020201), 2016-09-09
Supplement: appi.ajp.2016.16020201.ds001.pdf [file appi.ajp.2016.16020201.ds001.pdf]

## **Supplementary Methods**

### **Quality control**

A neuroimaging expert at each site individually examined each image segmentation by overlaying the segmentation label of each structure on the T1-weighted brain scan. Further, we collected study-wide statistics (means and standard deviations) as well as histogram plots in order to identify non-normally distributed data and major outliers. For additional quality control, outliers were determined by calculating the interquartile range for each of the volumes per cohort and per group (OCD patients and healthy controls). A subject was considered a statistical outlier if its volume was above or below 1.5 times the interquartile range. For each subject that was marked as a statistical outlier, individual sites were asked to re-inspect the subject's segmentation in order to evaluate that it was segmented properly, and excluded if necessary. Lastly, the coordinating PI site (VUMC Amsterdam) checked the histograms and summary statistics of every site on possible irregularities that would indicate incorrect segmentations. If needed sites were asked to re-inspect suspicious irregularities.

### **Meta-analytical details**

This meta-analytical framework enabled us to combine data from multiple sites and weigh individual effect size estimates by level of precision. All meta-analysis models were fit using the restricted maximum likelihood method (REML (1)). Percent differences were calculated for each effect size difference in order to restate the difference in terms of percentage change in brain volume. Percent difference is the meta-analyzed mean difference between cases and controls divided by the meta-analyzed mean volume in controls (x 100) for each trait. In addition to meta-analyzed Cohen's d effect size estimates and percent differences, we calculated heterogeneity scores ( $I^2$ ) for each structure, which provide the percent of the total variance in effect size that can be explained by heterogeneity alone (2). Lower values of  $I^2$  indicate lower variance in the effect size estimation across studies.

## **Power analysis**

We performed post hoc power analyses with G\*Power Version 3.2.1. (3) to estimate the sample sizes required to replicate the effects observed in this study. Sample size estimates present the number of subjects required in each group (in a case-control comparison) to detect an effect with 80% power at a nominal significance level ( $P=0.05$ ) for a two-sided t-test assuming unequal variance. All power estimates were obtained using the pwr package (version 1.1.1.) in R.

*Adult comparison:* On the basis of the final meta-analyzed effect size found in this study, a study comparing the general OCD population with controls would require 930 subjects in each group to detect mean differences in hippocampal volumes and 615 subjects in each group to detect mean differences in pallidum volumes to have 80% power at a significance level of  $P\text{-value}=0.05$ . With 1,495 adult OCD patients and 1472 healthy controls, we were able to detect brain volume differences as small as Cohen's  $d=0.1029$  at a nominal significance level  $P\text{-value}=0.05$  and 80% power (and Cohen's  $d=0.1327$  at our study significance threshold  $P\text{-value}=5.6 \times 10^{-3}$ ).

*Pediatric comparison:* Based on the effect sizes found in our study, a pediatric study would require 155 unmedicated OCD patients and 155 healthy controls to have 80% power to detect a difference in thalamus volume at  $P\text{-value}=0.05$ . The pediatric sample size of 335 OCD patients and 287 healthy controls, enabled us to detect brain volume differences with an effect size of Cohen's  $d=0.2257$  at a nominal significance level and 80% power (and Cohen's  $d=0.2914$  at our study significance threshold  $P\text{-value}=5.6 \times 10^{-3}$ ).

## **Included sites per clinical variable**

When a subgroup of the sample had too little subjects ( $<10$ ), this sample got excluded from the meta-regression analysis. When less than four sites could be included in the meta-regression analysis, the data was considered insufficient to permit analyses and provide reliable results.

## **Adult meta-analyses**

### *Medication status*

Ten samples were not included in the medicated versus controls analysis because of medication-free samples (van den Heuvel 3T II, van den Heuvel 1.5T I, Kwon 1.5T I, Nakamae 3T II, Reddy 1.5T I, Simpson, and Wang) or too little observations (< 10) on at least one of the brain structures (Hoexter, Kwon 3T, and Stein). Likewise, 8 samples (Cheng 1.5T I, Denys, Hoexter, Menchon, Nakao, Spalletta, Tolin, and Walitza) were not included because of too little observations in the unmediated OCD patients versus controls comparison. The medicated versus unmedicated comparison was performed with the 8 samples (Benedetti, Beucke, Cheng 3T II, Koch, Kwon 1.5T II, Mataix-Cols, Nakamae 1.5T I, and Reddy 3T II) in which both medicated and unmedicated patients were present and 10 or more observations were available on all of the brain structures (see Table S3A–C).

### *Comorbid MDD*

Twelve samples were excluded from the comorbid depression versus controls comparison because of the following reasons: 1) samples without depression comorbidity (Stein and Wang), 2) comorbidity status was not assessed (Koch), and 3) too little observations per condition (Benedetti, Cheng 1.5T I, Kwon 1.5T I, Kwon 1.5T II, Kwon 3T III, Nakamae 3T II, Reddy 1.5T I, Spalletta, Walitza). Two samples were not included in the comparison between patients without comorbid depression versus controls, because this was not assessed (Koch) and due to too little observations per condition (Walitza). The comorbid versus no comorbid MDD comparison was performed with the 13 samples (Beucke, Cheng 3T II, Denys, van den Heuvel 1.5T I, van den Heuvel 3T II, Hoexter, Mataix-Cols, Menchon,

Nakamae 1.5T I, Nakao, Reddy 3T II, Simpson, and Tolin) in which patients with comorbid depression and without comorbid depression were present and 10 or more observations were available on all of the brain structures (see Table S5A–C).

#### *Comorbid anxiety disorder*

Nineteen samples were not included in the comparison of OCD patients with a comorbid anxiety disorder versus controls. This variable was not assessed in two samples (Koch and Nakao) and in two other samples no patients with a comorbid anxiety disorder were present (Stein and Wang). The other 15 samples (Benedetti, Beucke, Cheng 1.5T I, Denys, van den Heuvel 1.5T I, van den Heuvel 3T II, Kwon 1.5T I, Kwon 1.5T II, Kwon 3T III, Nakamae 1.5T I, Nakamae 3T II, Reddy 1.5T I, Simpson, Spalletta, and Walitza) did not have enough observations on each brain structure. In the comparison of OCD patients without a comorbid anxiety disorder and controls 6 samples were excluded of which two because the variable was not assessed (Koch and Nakao) and the remaining 4 because of too little observations (Cheng 1.5T I, Cheng 3T II, Mataix-Cols, and Walitza). The comorbid versus no comorbid anxiety comparison was performed with 4 samples (Hoexter, Menchon, Reddy 3T II, and Tolin) in which patients with comorbid anxiety and without comorbid anxiety were present and 10 or more observations were available on all of the brain structures (see Table S6A–C).

#### *Symptom dimensions*

OCD symptom severity and symptom dimensions were assessed with the YBOCS severity scale and symptom checklist. The presence of five previously identified symptom

dimensions (4,5) designated as 1) “aggressive/checking”, 2) “contamination/cleaning”, 3) “symmetry/ordering”, 4) “sexual/religious obsessions”, and 5) “hoarding” was assessed. The dimensional structure of the YBOCS Checklist has been reasonably replicated and symptom dimensions are relatively independent from overall symptom severity (6). The consistency in the literature is remarkable despite the use of different instruments (YBOCS Checklist versus Obsessive-Compulsive Inventory) and methods (current versus lifetime symptoms, dichotomous versus ordinal scoring and factor versus cluster analysis e.g.). In agreement with many previous studies (7–10), responses on the major categories were quantified by the absence and presence of the symptoms under that category, either current or lifetime. A dimension was considered to be present if the patient reported either current or lifetime history of at least one symptom included in the dimension. The regression models existed of one symptom dimension being the covariate of interest and the other symptom dimensions being nuisance covariates (together with age, gender, and ICV as nuisance covariates).

The following samples did not assessed the YBOCS symptom checklist: Cheng 1.5T I, Cheng 3T II, Koch, Walitza. Therefore, these samples were excluded from the symptom dimension analyses. *Aggressive/checking*: Seven sites (Benedetti, Kwon 3T III, Menchon, Nakao, Reddy 1.5T I, Reddy 3T II, and Tolin) were included in the analysis for the first symptom dimension analysis. *Contamination/cleaning*: Nine sites (Benedetti, Kwon 3T III, Menchon, Nakamae 1.5T I, Nakao, Reddy 1.5T I, Reddy 3T II, Spalletta, Stein, and Tolin) were included in the second symptom dimension analysis. *Symmetry/ordering*: Thirteen sites (Benedetti, Beucke, Kwon 1.5T II, Kwon 3T III, Mataix-Cols, Menchon, Nakamae 1.5T I, Nakamae 3T II, Nakao, Reddy 1.5T I, Reddy 3T II, Simpson, and Spalletta) were included in

the third symptom dimension analysis. *Sexual/religious obsessions*: Eleven sites (Beucke, Kwon 1.5T II, Kwon 3T III, Mataix-Cols, Menchon, Nakamae 1.5T I, Nakao, Reddy 1.5T I, Reddy 3T II, Simpson, and Spalletta) were included in the fourth symptom dimension analysis. *Hoarding*: Twelve sites (Benedetti, Beucke, Denys, Kwon 1.5T II, Kwon 3T III, Mataix-Cols, Menchon, Nakamae 3T II, Nakamae 1.5T I, Nakao, Reddy 1.5T I, Reddy 3T II, and Spalletta) were included in the fifth symptom dimension analysis. All remaining sites were excluded due to too little observations on the covariate of interest.

#### *Age of onset/Disease duration*

One sample was not included in the age of onset and disease duration regression analyses because of missing information on age of onset (Tolin). This sample was, thus, also not included in the analyses in which early onset, late onset and controls were compared (Table S7A–C) nor in the regression analysis with age of onset and disease duration as continuous variables (Table S8A and S9A).

#### *Disease severity*

Each site assessed disease severity with the YBOCS. All sites entered in the regression analysis on severity (Table S10).

### **Pediatric meta-analyses**

#### *Medication status*

Four samples were not included in the medicated versus controls analysis (Table S4A) because of medication-free samples (Huyser and Soreni) or too little observations (< 10)

on at least one of the brain structures (Arnold and Walitza). Likewise, 4 samples (Arnold, Reddy 3T III, Soreni, and Walitza) were not included because of too little observations in the unmediated OCD patients versus controls comparison (Table 4). The medicated versus unmedicated comparison was performed with the 5 samples (Fitzgerald, Gruner, Hoexter, Lazaro 1.5T I, Lazaro 3T II) in which both medicated and unmedicated patients were present and 10 or more observations were available on all of the brain structures (see Table S4B).

#### *Comorbid MDD*

All pediatric sites, except for one, had less than 10 subjects with a comorbid lifetime depression in their sample. One site had not assessed lifetime but current diagnosis on comorbid depression. Thus the meta-analysis on patients with a comorbid depression versus healthy controls was not conducted. The comparison of patients with versus patients without a comorbid depression was not conducted for the same reason. The comparison of patients without a comorbid depression versus healthy controls was conducted, but not reported as this comparison only does not contribute to the relative meaning of a comorbid depression.

#### *Comorbid anxiety disorder*

Seven pediatric sites had less than 10 subjects with a comorbid anxiety disorder in their sample. Only two sites had enough subjects to perform stratified analyses. However, the OCD patients with a comorbid anxiety disorders versus healthy control meta-analysis could not be conducted statistically with only 2 sites. Due to the same reason the OCD patients

with a comorbid anxiety disorder versus without a comorbid anxiety disorder meta-analysis could not be conducted either. The comparison of patients without a comorbid anxiety disorder versus healthy controls was conducted, but not reported because this comparison only does not contribute to the relative meaning of a comorbid anxiety disorder.

### *Symptom dimensions*

Three pediatric samples had not assessed the CYBOCS symptom checklist. Another three sites did not have enough subjects with a presence and/or absence in each of the subdimensions in their sample. For the aggression/check dimension only two sites were left with sufficient number of subjects with and without the presence of this subdimension; for the contamination/cleaning dimension only one site was left for analysis; for the symmetry/ordering dimension only two sites were left; for the sexual/religious obsessions three sites were left to analyze; and finally two samples were left with respect to the hoarding dimension.

### *Age of onset/disease duration*

Three samples were not included in the age of onset and disease duration regression analyses because of missing information on age of onset (Gruner and Soreni) or too little observations (Walitza).

### *Disease severity*



Each site assessed disease severity with the CYBOCS. However, 1 site was not entered in the regression analysis on severity because of too little observations on at least one region of interest due to quality control exclusions (Walitza).

## REFERENCES

1. Harville D. Maximum Likelihood Approaches to Variance Component Estimation and to Related Problems. *J Am Stat Assoc.* 1977;72(358):320–38.
2. Higgins JPT, Thompson SG. Quantifying heterogeneity in a meta-analysis. *Stat Med.* 2002;21(11):1539–58.
3. Erdfelder E, Faul F, Buchner A. GPOWER: A general power analysis program. *Behav Res Methods, Instruments, Comput.* 1996;28(1):1–11.
4. Mataix-Cols D. Deconstructing obsessive–compulsive disorder: a multidimensional perspective. *Curr Opin Psychiatry.* 2006;19(19):84–8984.
5. Bloch MH, Landeros-Weisenberger A, Rosario MC, Pittenger C, Leckman JF. Meta-analysis of the symptom structure of obsessive-compulsive disorder. *Am J Psychiatry.* 2008;165(12):1532–42.
6. Mataix-Cols D, Fullana MA, Alonso P, Menchón JM, Vallejo J. Convergent and discriminant validity of the Yale-Brown Obsessive-Compulsive Scale Symptom Checklist. *Psychother Psychosom.* 2004;73(3):190–6.
7. De Wit SJ, Alonso P, Schweren L, Mataix-Cols D, Lochner C, Menchón JM, et al. Multicenter voxel-based morphometry mega-analysis of structural brain scans in obsessive-compulsive disorder. *Am J Psychiatry.* 2014;171(3):340–9.
8. Mataix-Cols D, Rauch SL, Baer L, Eisen JL, Shera DM, Goodman WK, et al. Symptom stability in adult obsessive-compulsive disorder: Data from a naturalistic two-year follow-up study. *Am J Psychiatry.* 2002;159(2):263–8.
9. Rufer M, Grothausen A, Maß R, Peter H, Hand I. Temporal stability of symptom dimensions in adult patients with obsessive-compulsive disorder. *J Affect Disord.* 2005;88(1):99–102.
10. Van Den Heuvel OA., Remijnse PL, Mataix-Cols D, Vrenken H, Groenewegen HJ, Uylings HBM, et al. The major symptom dimensions of obsessive-compulsive disorder are mediated by partially distinct neural systems. *Brain.* 2009;132(4):853–68.

## Supplementary Tables

**Table S1:** Image acquisition parameters per site.

**Table S2:** Full meta-analytic results for each mean structure for the pediatric OCD patients versus pediatric controls comparison, controlling for age, sex, scan center, and ICV. Adjusted Cohen's d is reported.

**Table S3A:** Full meta-analytic results for each mean structure for the adult medicated OCD patients versus controls comparison, controlling for age, sex, scan center, and ICV. Adjusted Cohen's d is reported.

**Table S3B:** Full meta-analytic results for each mean structure for the adult unmedicated OCD patients versus controls comparison, controlling for age, sex, scan center, and ICV. Adjusted Cohen's d is reported.

**Table S3C:** Full meta-analytic results for each mean structure for the adult medicated OCD patients versus unmedicated OCD patients comparison, controlling for age, sex, scan center, and ICV. Adjusted Cohen's d is reported.

**Table S4A:** Full meta-analytic results for each mean structure for the pediatric medicated OCD patients versus pediatric controls comparison, controlling for age, sex, scan center, and ICV. Adjusted Cohen's d is reported.

**Table S4B:** Full meta-analytic results for each mean structure for the medicated versus unmedicated pediatric OCD comparison, controlling for age, sex, scan center, and ICV. Adjusted Cohen's d is reported.

**Table S5A:** Full meta-analytic results for each mean structure for the adult OCD patients with a comorbid depression versus controls comparison, controlling for age, sex, scan center, and ICV. Adjusted Cohen's d is reported.

**Table S5B:** Full meta-analytic results for each mean structure for the adult OCD patients without a comorbid depression versus controls comparison, controlling for age, sex, scan center, and ICV. Adjusted Cohen's d is reported.

**Table S5C:** Full meta-analytic results for each mean structure for the adult OCD patients with versus without a comorbid depression comparison, controlling for age, sex, scan center, and ICV. Adjusted Cohen's d is reported.

**Table S6A:** Full meta-analytic results for each mean structure for the adult OCD patients with a comorbid anxiety disorder versus controls comparison, controlling for age, sex, scan center, and ICV. Adjusted Cohen's d is reported.

**Table S6B:** Full meta-analytic results for each mean structure for the adult OCD patients without a comorbid anxiety disorder versus controls comparison, controlling for age, sex, scan center, and ICV. Adjusted Cohen's  $d$  is reported.

**Table S6C:** Full meta-analytic results for each mean structure for the adult OCD patients with versus without a comorbid anxiety disorder comparison, controlling for age, sex, scan center, and ICV. Adjusted Cohen's  $d$  is reported.

**Table S7A:** Full meta-analytic results for each mean structure for the adult early onset OCD patients versus controls comparison, controlling for age, sex, scan center, and ICV. Adjusted Cohen's  $d$  is reported.

**Table S7B:** Full meta-analytic results for each mean structure for the adult late onset OCD patients versus controls comparison, controlling for age, sex, scan center, and ICV. Adjusted Cohen's  $d$  is reported.

**Table S7C:** Full meta-analytic results for each mean structure for the adult late onset versus early onset OCD patients comparison, controlling for age, sex, scan center, and ICV. Adjusted Cohen's  $d$  is reported.

**Table S8A:** Full meta-analytic results for each mean structure for the association between age of onset and brain volumes within adult OCD patients controlling for age, sex, scan center, and ICV. Correlation coefficient Pearson's  $r$  is reported.

**Table S8B:** Full meta-analytic results for each mean structure for the association between age of onset and brain volumes within pediatric OCD patients controlling for age, sex, scan center, and ICV. Correlation coefficient Pearson's  $r$  is reported.

**Table S9A:** Full meta-analytic results for each mean structure for the association between disease duration and brain volumes within adult OCD patients controlling for age, sex, scan center, and ICV. Correlation coefficient Pearson's  $r$  is reported.

**Table S9B:** Full meta-analytic results for each mean structure for the association between disease duration and brain volumes within pediatric OCD patients controlling for age, sex, scan center, and ICV. Correlation coefficient Pearson's  $r$  is reported.

**Table S10:** Full meta-analytic results for each mean structure for the association between symptom severity and brain volumes within OCD patients based on the YBOCS, controlling for age, sex, scan center, and ICV. Correlation coefficient Pearson's  $r$  is reported.

**Table S11:** Full meta-analytic results for each mean structure for the association between symptom severity and brain volumes within pediatric OCD patients based on the CYBOCS, controlling for age, sex, scan center, and ICV. Correlation coefficient Pearson's  $r$  is reported.

**Table S12:** Full results from the moderator analyses in the adult samples of mean age, field strength of scanner, percent of medicated patients, percent of patients taking SSRIs, percent of

patients taking antipsychotics, percent comorbid anxiety, and percent comorbid depression. The table is split into two parts to fit on a single page for easier comparison.

**Table S13:** Full results from the moderator analyses in the pediatric samples of mean age and field strength of scanner.

**Table S14:** Significant ( $P < 5.6 \times 10^{-3}$ ) results of the adult mega-analysis of subcortical brain volumes. The standardized beta is reported. Analyses are controlled for age, sex, scan center and ICV.

**Table S15.** Significant ( $P < 5.6 \times 10^{-3}$ ) results of the pediatric mega-analysis of subcortical brain volumes. The standardized beta is reported. Analyses are controlled for age (or age squared if listed), sex, scan center and ICV.

**Table S1.** Image acquisition parameters per site.

| PI site        | Site, Country, Sample | Scanner vendor and type      | Acquisition parameters                                                          |
|----------------|-----------------------|------------------------------|---------------------------------------------------------------------------------|
| Arnold         | Ontario, CAN          | 3T Siemens Tim Trio VB17     | Matrix 192 x 240, 256 slices, Voxel size = 1 mm ISO                             |
| Benedetti      | Milan, ITA            | 3T Philips Gyroscan Intera   | Matrix 256 x 256, 220 slices, Voxel size 1 x 1 x 1 mm                           |
| Beucke         | Berlin, GER           | 1.5T Siemens Sonata          | Matrix 256 x 224, 176 slices, Voxel size = 1mm ISO                              |
| Cheng          | Kunming, CHN I        | 1.5T GE Signa Excite         | Matrix 256 x 256, 172 slices, Voxel size 0.93 x 0.93 x 0.9 mm                   |
|                | Kunming, CHN II       | 3T Philips Achieva           | Matrix 228 x 228, 230 slices, Voxel size 1.1 x 1.1 x 0.6 mm                     |
| Denys          | Amsterdam, NLD        | 3T Philips Intera            | Matrix 256 x 256, 182/180 slices, Voxel size 1.2 x 0.833 x 0.833/ 1 x 0.5 x 0.5 |
| Fitzgerald     | Michigan, USA         | 3T GE Signa                  | Matrix 256 x 256, 124 slices, Voxel size 1.02 x 1.02 x 1.2 mm                   |
| Gruner         | Conneticut, USA       | 3T GE Signa                  | Matrix 256 x 256, 216 slices, Voxel size 0.976 x 0.976 x 1.0 mm                 |
| van den Heuvel | Amsterdam, NLD I      | 1.5T Siemens Sonata          | Matrix 256 x 160, 160 slices, Voxel size 1 x 1 x 1.5 mm                         |
|                | Amsterdam, NLD II     | 3T GE Healthcare Signa HDxt  | Matrix 256 x 256, 172 slices, Voxel size 1 x 0.977 x 0.977                      |
| Hoexter        | Sao Paulo, BRA I      | 1.5T GE Signa                | Matrix 256 x 192, 248 slices, Voxel size 0.94 x 0.94 x 0.80 mm                  |
|                | Sao Paulo, BRA II     | 3T Philips Achieva           | Matrix 256 x 256, 208 slices, Voxel size 1 x 0.977 x 0.977 mm                   |
| Huyser         | Amsterdam, NLD        | 3T Philips Intera MR         | Matrix 256 x 256, 182 slices, Voxel size 1 x 1 x 1.2 mm                         |
| Koch           | Munchen, GER          | 3T Philips Ingenia           | Matrix 240 x 240, 170 slices/256 x 256 x 170, Voxel size 1 x 1 x 1 mm           |
| Kwon           | Seoul, KOR I          | 1.5T GE Signa                | Matrix 256 x 256, 124 slices, Voxel size 0.82 x 0.82 x 1.5 mm                   |
|                | Seoul, KOR II         | 1.5T Siemens Avanto          | Matrix 416 x 512, 160-208 slices, Voxel size 0.45 x 0.45 x 0.9 mm               |
|                | Seoul, KOR III        | 3T Siemens Trio              | Matrix 256 x 256, 208 slices, Voxel size 1 x 0.977 x 0.977 mm                   |
| Lazaro         | Barcelona, ESP I      | 1.5T GE Signa LX             | Matrix 256 x 256, 128 slices, Voxel size 1 x 1 x 1 mm                           |
|                | Barcelona, ESP II     | 3T Siemens Magnetom Tim      | Matrix 256 x 256, 240 slices, Voxel size 1 x 1 x 1 mm                           |
| Mataix-Cols    | Stockholm, SWE        | 1.5T GE Signa                | Matrix 256 x 256, 124 slices, Voxel size 0.94 x 0.94 x 1.5 mm                   |
|                |                       | 1.5T GE Signa HDx            | Matrix 256 x 256, 146 slices, Voxel size 1.09 x 1.09 x 1.1 mm                   |
| Menchon        | Barcelona, ESP        | 1.5T GE Signa Excite         | Matrix 256 x 256, 130 slices, Voxel size 1.2 x 1.2 x 1.2 mm                     |
| Nakamae        | Kyoto, JPN I          | 1.5T Philips Gyroscan Intera | Matrix 256 x 256, 130 slices, Voxel size 0.98 x 0.98 x 1.5 mm                   |
|                | Kyoto, JPN II         | 3T Philips Gyroscan Intera   | Matrix 256 x 256, 170 slices, Voxel size 1.0 x 1.0 x 1.0 mm                     |
| Nakao          | Fukuoka, JPN          | 3T Philips Achieva TX        | Matrix 240 x 240, 190 slices, Voxel size 1.8 x 1.8 x 1.8 mm                     |
| Reddy          | Bangalore, IND I      | 1.5T Siemens Vision          | Matrix 256 x 160, 160 slices, Voxel size 0.98 x 0.98 x 1 mm                     |
|                | Bangalore, IND II     | 3T Siemens Skyra             | Matrix 256 x 256, 192 slices, Voxel size 1.0 x 1.0 x 1.0 mm                     |
|                | Bangalore, IND III    | 3T Philips Achieva           | Matrix 256 x 256, 165 slices, Voxel size 1.0 x 1.0 x 1.0 mm                     |

|           |                 |                    |                                                                 |
|-----------|-----------------|--------------------|-----------------------------------------------------------------|
| Simpson   | New York, USA   | 3T GE Signa        | Matrix 256 x 256, 164 slices, Voxel size 0.976 x 0.976 x 1.0 mm |
| Soreni    | Ontario, CAN    | 3T GE Excite       | Matrix 512 x 512, 148 slices, Voxel size 0.468 x 0.469 x 1 mm   |
| Spalletta | Rome, ITA       | 3T Siemens Allegra | Matrix 256 x 256, 176 slices, Voxel size 1 x 1 x 1 mm           |
| Stein     | Cape Town, ZAF  | 3T Siemens Allegra | Matrix 256 x 256, 160 slices, Voxel size 1.3 x 1.0 x 1.0 mm     |
| Tolin     | Conneticut, USA | 3T Siemens Allegra | Matrix 64 x 64, 29 slices, Voxel size 1 x 1 x 1 mm              |
| Walitza   | Zurich, CHE I   | 3T Philips Achieva | Matrix 240 x 240, 160 slices, Voxel size 1 x 1 x 1 mm ISO       |
|           | Zurich, CHE II  | 3T Philips Achieva | Matrix 240 x 240, 160 slices, Voxel size 1 x 1 x 1 mm ISO       |
| Wang      | Shanghai, CHN   | 3T Siemens Verio   | Matrix 256 x 256, 192 slices, Voxel size 1.0 x 1.0 x 1.0 mm     |

**Table S2.** Full meta-analytic results for each mean structure for the pediatric OCD patients versus pediatric controls comparison, controlling for age, sex, scan center, and ICV. Adjusted Cohen's d is reported.

|                    | <i>Cohen's d<br/>(pediatric<br/>OCD-HC)</i> | <i>Standard error</i> | <i>95% CI</i> |          | <i>% Difference</i> | <i>P-value</i> | <i>I<sup>2</sup></i> | <i>Number of<br/>controls</i> | <i>Number of<br/>patients</i> |
|--------------------|---------------------------------------------|-----------------------|---------------|----------|---------------------|----------------|----------------------|-------------------------------|-------------------------------|
| Lateral Ventricles | 0,178                                       | 0,105                 | -0,027        | to 0,383 | 1,706               | 0,088          | 33,520               | 284                           | 330                           |
| Thalamus           | 0,239                                       | 0,111                 | 0,022         | to 0,455 | 2,156               | 0,031          | 35,183               | 262                           | 310                           |
| Caudate            | 0,046                                       | 0,097                 | -0,143        | to 0,236 | 0,480               | 0,631          | 18,272               | 258                           | 312                           |
| Putamen            | -0,013                                      | 0,106                 | -0,221        | to 0,195 | -0,122              | 0,903          | 26,188               | 259                           | 296                           |
| Pallidum           | -0,124                                      | 0,156                 | -0,430        | to 0,183 | -0,791              | 0,429          | 61,684               | 224                           | 271                           |
| Hippocampus        | 0,060                                       | 0,095                 | -0,125        | to 0,246 | 0,636               | 0,525          | 17,318               | 276                           | 307                           |
| Amygdala           | 0,142                                       | 0,176                 | -0,203        | to 0,487 | 0,805               | 0,421          | 72,614               | 248                           | 282                           |
| Accumbens          | -0,104                                      | 0,098                 | -0,297        | to 0,089 | -1,058              | 0,290          | 21,685               | 266                           | 323                           |
| ICV*               | -0,050                                      | 0,101                 | -0,248        | to 0,149 | -0,490              | 0,624          | 30,404               | 287                           | 334                           |

Abbreviations: Obsessive Compulsive Disorder (OCD), Healthy Control (HC), Intracranial Volume (ICV), Confidence Interval (CI)

\* Controlled for age, sex and scan center

**Table S3A.** Full meta-analytic results for each mean structure for the adult medicated OCD patients versus controls comparison, controlling for age, sex, scan center, and ICV. Adjusted Cohen's d is reported.

|                           | <i>Cohen's d (medicated<br/>OCD-HC)</i> | <i>Standard error</i> | <i>95% CI</i> |           | <i>% Difference</i> | <i>P-value</i> | <i>I<sup>2</sup></i>          | <i>Number of<br/>controls</i> | <i>Number of<br/>patients</i> |            |
|---------------------------|-----------------------------------------|-----------------------|---------------|-----------|---------------------|----------------|-------------------------------|-------------------------------|-------------------------------|------------|
| <b>Lateral Ventricles</b> | <b>0,245</b>                            | <b>0,082</b>          | <b>0,083</b>  | <b>to</b> | <b>0,406</b>        | <b>2,973</b>   | <b>2,95 × 10<sup>-3</sup></b> | <b>53,793</b>                 | <b>1005</b>                   | <b>622</b> |
| Thalamus                  | -0,112                                  | 0,056                 | -0,222        | to        | -0,002              | -1,997         | 0,046                         | 4,368                         | 969                           | 576        |
| Caudate                   | 0,095                                   | 0,054                 | -0,011        | to        | 0,201               | 1,764          | 0,078                         | 0,000                         | 975                           | 598        |
| Putamen                   | 0,149                                   | 0,072                 | 0,008         | to        | 0,291               | 2,065          | 0,039                         | 34,163                        | 922                           | 563        |
| <b>Pallidum</b>           | <b>0,287</b>                            | <b>0,066</b>          | <b>0,159</b>  | <b>to</b> | <b>0,416</b>        | <b>4,378</b>   | <b>1,20 × 10<sup>-5</sup></b> | <b>20,570</b>                 | <b>907</b>                    | <b>547</b> |
| <b>Hippocampus</b>        | <b>-0,294</b>                           | <b>0,070</b>          | <b>-0,432</b> | <b>to</b> | <b>-0,156</b>       | <b>-4,179</b>  | <b>2,93 × 10<sup>-5</sup></b> | <b>35,306</b>                 | <b>982</b>                    | <b>600</b> |
| Amygdala                  | -0,121                                  | 0,064                 | -0,246        | to        | 0,004               | -1,904         | 0,057                         | 23,163                        | 971                           | 608        |
| Accumbens                 | -0,074                                  | 0,071                 | -0,213        | to        | 0,066               | -1,035         | 0,301                         | 37,986                        | 996                           | 611        |
| ICV*                      | -0,127                                  | 0,053                 | -0,231        | to        | -0,023              | -2,400         | 0,016                         | 0,006                         | 1009                          | 623        |

Abbreviations: Obsessive Compulsive Disorder (OCD), Healthy Control (HC), Intracranial Volume (ICV), Confidence Interval (CI)

\* Controlled for age, sex and scan center

**Table S3B.** Full meta-analytic results for each mean structure for the adult unmedicated OCD patients versus controls comparison, controlling for age, sex, scan center, and ICV. Adjusted Cohen's d is reported.

|                    | <i>Cohen's d (unmedicated<br/>OCD-HC)</i> | <i>Standard error</i> | <i>95% CI</i> |    | <i>% Difference</i> | <i>P-value</i> | <i>I<sup>2</sup></i> | <i>Number of<br/>controls</i> | <i>Number of<br/>patients</i> |     |
|--------------------|-------------------------------------------|-----------------------|---------------|----|---------------------|----------------|----------------------|-------------------------------|-------------------------------|-----|
| Lateral Ventricles | 0,063                                     | 0,094                 | -0,121        | to | 0,247               | 0,669          | 0,503                | 70,145                        | 1079                          | 744 |
| Thalamus           | -0,043                                    | 0,050                 | -0,142        | to | 0,055               | -0,865         | 0,387                | 0,000                         | 1054                          | 714 |
| Caudate            | -0,006                                    | 0,063                 | -0,130        | to | 0,118               | -0,090         | 0,928                | 34,080                        | 1066                          | 733 |
| Putamen            | -0,071                                    | 0,051                 | -0,171        | to | 0,029               | -1,396         | 0,163                | 0,000                         | 998                           | 700 |
| Pallidum           | 0,089                                     | 0,065                 | -0,039        | to | 0,216               | 1,367          | 0,172                | 31,869                        | 983                           | 688 |
| Hippocampus        | -0,065                                    | 0,050                 | -0,163        | to | 0,032               | -1,313         | 0,189                | 0,000                         | 1066                          | 725 |
| Amygdala           | -0,109                                    | 0,073                 | -0,251        | to | 0,034               | -1,497         | 0,134                | 48,424                        | 1056                          | 726 |
| Accumbens          | -0,004                                    | 0,050                 | -0,102        | to | 0,093               | -0,087         | 0,930                | 0,000                         | 1068                          | 735 |
| ICV*               | 0,064                                     | 0,049                 | -0,032        | to | 0,161               | 1,304          | 0,192                | 0,032                         | 1083                          | 745 |

Abbreviations: Obsessive Compulsive Disorder (OCD), Intracranial Volume (ICV), Confidence Interval (CI)

\* Controlled for age, sex and scan center

**Table S3C.** Full meta-analytic results for each mean structure for the adult medicated OCD patients versus unmedicated OCD patients comparison, controlling for age, sex, scan center, and ICV. Adjusted Cohen's d is reported.

|                    | <i>Cohen's d<br/>(medicated-unmedicated<br/>OCD)</i> | <i>Standard<br/>error</i> | <i>95% CI</i> |           | <i>% Difference</i> | <i>P-value</i> | <i>I2</i> | <i>Number of<br/>unmedicated<br/>patients</i> | <i>Number of<br/>medicated<br/>patients</i> |
|--------------------|------------------------------------------------------|---------------------------|---------------|-----------|---------------------|----------------|-----------|-----------------------------------------------|---------------------------------------------|
| Lateral Ventricles | 0,216                                                | 0,141                     | -0,061        | to 0,492  | 1,530               | 0,126          | 62,183    | 341                                           | 311                                         |
| Thalamus           | 0,046                                                | 0,083                     | -0,116        | to 0,209  | 0,559               | 0,576          | 0,000     | 327                                           | 300                                         |
| Caudate            | 0,078                                                | 0,109                     | -0,136        | to 0,293  | 0,717               | 0,473          | 38,031    | 337                                           | 308                                         |
| Putamen            | 0,179                                                | 0,137                     | -0,089        | to 0,447  | 1,312               | 0,190          | 56,762    | 325                                           | 295                                         |
| Pallidum           | 0,201                                                | 0,116                     | -0,027        | to 0,428  | 1,725               | 0,085          | 40,540    | 325                                           | 293                                         |
| Hippocampus        | -0,187                                               | 0,082                     | -0,348        | to -0,025 | -2,270              | 0,023          | 0,000     | 332                                           | 303                                         |
| Amygdala           | 0,031                                                | 0,116                     | -0,196        | to 0,258  | 0,266               | 0,790          | 42,406    | 329                                           | 303                                         |
| Accumbens          | -0,038                                               | 0,116                     | -0,265        | to 0,189  | -0,325              | 0,745          | 43,833    | 335                                           | 306                                         |
| ICV*               | -0,090                                               | 0,081                     | -0,248        | to 0,069  | -1,106              | 0,269          | 0,000     | 341                                           | 312                                         |

Abbreviations: Obsessive Compulsive Disorder (OCD), Intracranial Volume (ICV), Confidence Interval (CI)

\* Controlled for age, sex and scan center

**Table S4A.** Full meta-analytic results for each mean structure for the pediatric medicated OCD patients versus pediatric controls comparison, controlling for age, sex, scan center, and ICV. Adjusted Cohen's d is reported.

|                    | <i>Cohen's d<br/>(pediatric medicated<br/>OCD-HC)</i> | <i>Standard error</i> | <i>95% CI</i> |                  | <i>% Difference</i> | <i>P-value</i>                | <i>I2</i>    | <i>Number of<br/>controls</i> | <i>Number of<br/>patients</i> |
|--------------------|-------------------------------------------------------|-----------------------|---------------|------------------|---------------------|-------------------------------|--------------|-------------------------------|-------------------------------|
| Lateral Ventricles | 0,370                                                 | 0,182                 | 0,012         | to 0,727         | 2,027               | 0,043                         | 57,463       | 205                           | 137                           |
| Thalamus           | 0,266                                                 | 0,173                 | -0,073        | to 0,605         | 1,539               | 0,124                         | 52,785       | 199                           | 136                           |
| Caudate            | 0,182                                                 | 0,122                 | -0,056        | to 0,421         | 1,497               | 0,134                         | 8,709        | 192                           | 132                           |
| Putamen            | -0,003                                                | 0,125                 | -0,247        | to 0,241         | -0,024              | 0,981                         | 13,627       | 198                           | 135                           |
| Pallidum           | -0,146                                                | 0,119                 | -0,378        | to 0,087         | -1,228              | 0,220                         | 0,000        | 173                           | 127                           |
| Hippocampus        | -0,123                                                | 0,115                 | -0,349        | to 0,102         | -1,070              | 0,285                         | 0,004        | 201                           | 129                           |
| Amygdala           | 0,085                                                 | 0,317                 | -0,535        | to 0,706         | 0,269               | 0,788                         | 84,251       | 186                           | 122                           |
| <b>Accumbens</b>   | <b>-0,316</b>                                         | <b>0,113</b>          | <b>-0,537</b> | <b>to -0,094</b> | <b>-2,791</b>       | <b>5,25 × 10<sup>-3</sup></b> | <b>0,000</b> | <b>201</b>                    | <b>138</b>                    |
| ICV*               | -0,046                                                | 0,183                 | -0,405        | to 0,314         | -0,249              | 0,803                         | 59,010       | 208                           | 139                           |

Abbreviations: Obsessive Compulsive Disorder (OCD), Healthy Control (HC), Intracranial Volume (ICV), Confidence Interval (CI)

\* Controlled for age, sex and scan center



**Table S4B.** Full meta-analytic results for each mean structure for the medicated versus unmedicated pediatric OCD comparison, controlling for age, sex, scan center, and ICV. Adjusted Cohen's d is reported.

|                    | <i>Cohen's d<br/>(medicated-unmedicated<br/>pediatric OCD)</i> | <i>Standard<br/>error</i> | <i>95% CI</i> |          | <i>% Difference</i> | <i>P-value</i> | <i>I2</i> | <i>Number of<br/>unmedicated<br/>patients</i> | <i>Number of<br/>medicated<br/>patients</i> |
|--------------------|----------------------------------------------------------------|---------------------------|---------------|----------|---------------------|----------------|-----------|-----------------------------------------------|---------------------------------------------|
| Lateral Ventricles | 0,268                                                          | 0,162                     | -0,050        | to 0,586 | 1,651               | 0,099          | 14,848    | 88                                            | 122                                         |
| Thalamus           | -0,137                                                         | 0,193                     | -0,516        | to 0,241 | -0,710              | 0,478          | 36,754    | 84                                            | 121                                         |
| Caudate            | 0,089                                                          | 0,227                     | -0,357        | to 0,534 | 0,389               | 0,697          | 53,485    | 84                                            | 117                                         |
| Putamen            | 0,065                                                          | 0,176                     | -0,279        | to 0,409 | 0,370               | 0,712          | 25,117    | 85                                            | 121                                         |
| Pallidum           | 0,020                                                          | 0,157                     | -0,287        | to 0,327 | 0,127               | 0,899          | 0,000     | 72                                            | 112                                         |
| Hippocampus        | -0,288                                                         | 0,151                     | -0,584        | to 0,008 | -1,905              | 0,057          | 0,002     | 83                                            | 115                                         |
| Amygdala           | 0,004                                                          | 0,234                     | -0,454        | to 0,462 | 0,018               | 0,986          | 50,918    | 70                                            | 107                                         |
| Accumbens          | -0,060                                                         | 0,146                     | -0,346        | to 0,226 | -0,410              | 0,682          | 0,004     | 87                                            | 123                                         |
| ICV*               | -0,179                                                         | 0,145                     | -0,463        | to 0,104 | -1,241              | 0,214          | 0,000     | 89                                            | 124                                         |

Abbreviations: Obsessive Compulsive Disorder (OCD), Intracranial Volume (ICV), Confidence Interval (CI)

\* Controlled for age, sex and scan center

**Table S5A.** Full meta-analytic results for each mean structure for the adult OCD patients with a comorbid depression versus controls comparison, controlling for age, sex, scan center, and ICV. Adjusted Cohen's d is reported.

|                           | <i>Cohen's d<br/>(comorbid depression<br/>OCD-HC)</i> | <i>Standard<br/>error</i> | <i>95% CI</i> |                  | <i>% Difference</i> | <i>P-value</i>                | <i>I2</i>    | <i>Number of<br/>controls</i> | <i>Number of<br/>patients</i> |
|---------------------------|-------------------------------------------------------|---------------------------|---------------|------------------|---------------------|-------------------------------|--------------|-------------------------------|-------------------------------|
| <b>Lateral Ventricles</b> | <b>0,291</b>                                          | <b>0,076</b>              | <b>0,143</b>  | <b>to 0,439</b>  | <b>3,854</b>        | <b>1,16 × 10<sup>-4</sup></b> | <b>0,000</b> | <b>756</b>                    | <b>246</b>                    |
| Thalamus                  | -0,225                                                | 0,082                     | -0,385        | to -0,065        | -2,751              | 0,006                         | 0,000        | 685                           | 205                           |
| Caudate                   | 0,007                                                 | 0,121                     | -0,230        | to 0,245         | 0,060               | 0,952                         | 56,864       | 719                           | 229                           |
| Putamen                   | 0,003                                                 | 0,082                     | -0,157        | to 0,163         | 0,037               | 0,971                         | 0,000        | 631                           | 211                           |
| Pallidum                  | 0,228                                                 | 0,099                     | 0,035         | to 0,421         | 2,317               | 0,021                         | 25,582       | 615                           | 203                           |
| <b>Hippocampus</b>        | <b>-0,274</b>                                         | <b>0,080</b>              | <b>-0,432</b> | <b>to -0,117</b> | <b>-3,413</b>       | <b>6,43 × 10<sup>-4</sup></b> | <b>7,664</b> | <b>731</b>                    | <b>237</b>                    |
| Amygdala                  | -0,185                                                | 0,097                     | -0,374        | to 0,005         | -1,913              | 0,056                         | 33,595       | 711                           | 235                           |
| Accumbens                 | -0,061                                                | 0,076                     | -0,210        | to 0,088         | -0,805              | 0,421                         | 0,000        | 734                           | 243                           |
| ICV*                      | -0,055                                                | 0,081                     | -0,214        | to 0,103         | -0,684              | 0,494                         | 12,090       | 757                           | 246                           |

Abbreviations: Obsessive Compulsive Disorder (OCD), Healthy Control (HC), Intracranial Volume (ICV), Confidence Interval (CI)

\* Controlled for age, sex and scan center

**Table S5B.** Full meta-analytic results for each mean structure for the adult OCD patients without a comorbid depression versus controls comparison, controlling for age, sex, scan center, and ICV. Adjusted Cohen's d is reported.

|                    | <i>Cohen's d (no comorbid depression OCD-HC)</i> | <i>Standard error</i> | <i>95% CI</i> |                  | <i>% Difference</i> | <i>P-value</i>                | <i>I<sup>2</sup></i> | <i>Number of controls</i> | <i>Number of patients</i> |
|--------------------|--------------------------------------------------|-----------------------|---------------|------------------|---------------------|-------------------------------|----------------------|---------------------------|---------------------------|
| Lateral Ventricles | 0,110                                            | 0,077                 | -0,040        | to 0,260         | 1,439               | 0,150                         | 67,645               | 1373                      | 1085                      |
| Thalamus           | -0,069                                           | 0,046                 | -0,159        | to 0,022         | -1,489              | 0,136                         | 10,341               | 1298                      | 1021                      |
| Caudate            | 0,037                                            | 0,042                 | -0,046        | to 0,119         | 0,873               | 0,383                         | 0,000                | 1332                      | 1056                      |
| Putamen            | 0,044                                            | 0,058                 | -0,070        | to 0,158         | 0,758               | 0,448                         | 37,603               | 1246                      | 1010                      |
| <b>Pallidum</b>    | <b>0,193</b>                                     | <b>0,051</b>          | <b>0,093</b>  | <b>to 0,293</b>  | <b>3,782</b>        | <b>1,56 × 10<sup>-4</sup></b> | <b>20,223</b>        | <b>1225</b>               | <b>991</b>                |
| <b>Hippocampus</b> | <b>-0,156</b>                                    | <b>0,048</b>          | <b>-0,249</b> | <b>to -0,063</b> | <b>-3,279</b>       | <b>1,04 × 10<sup>-3</sup></b> | <b>16,835</b>        | <b>1347</b>               | <b>1051</b>               |
| Amygdala           | -0,118                                           | 0,057                 | -0,230        | to -0,007        | -2,083              | 0,037                         | 39,533               | 1326                      | 1062                      |
| Accumbens          | -0,051                                           | 0,049                 | -0,147        | to 0,045         | -1,039              | 0,299                         | 22,179               | 1355                      | 1068                      |
| ICV*               | 0,003                                            | 0,053                 | -0,101        | to 0,108         | 0,065               | 0,948                         | 33,633               | 1377                      | 1087                      |

Abbreviations: Obsessive Compulsive Disorder (OCD), Healthy Control (HC), Intracranial Volume (ICV), Confidence Interval (CI)

\* Controlled for age, sex and scan center

**Table S5C.** Full meta-analytic results for each mean structure for the adult OCD patients with versus without a comorbid depression comparison, controlling for age, sex, scan center, and ICV. Adjusted Cohen's d is reported.

|                    | <i>Cohen's d (comorbid depression- no comorbid depression OCD)</i> | <i>Standard error</i> | <i>95% CI</i> |          | <i>% Difference</i> | <i>P-value</i> | <i>I<sup>2</sup></i> | <i>Number of patients no comorbid depression</i> | <i>Number of patients with comorbid depression</i> |
|--------------------|--------------------------------------------------------------------|-----------------------|---------------|----------|---------------------|----------------|----------------------|--------------------------------------------------|----------------------------------------------------|
| Lateral Ventricles | 0,149                                                              | 0,110                 | -0,067        | to 0,366 | 1,355               | 0,175          | 45,450               | 632                                              | 246                                                |
| Thalamus           | -0,113                                                             | 0,085                 | -0,281        | to 0,054 | -1,331              | 0,183          | 0,002                | 570                                              | 205                                                |
| Caudate            | 0,070                                                              | 0,126                 | -0,176        | to 0,316 | 0,561               | 0,575          | 55,255               | 603                                              | 229                                                |
| Putamen            | -0,030                                                             | 0,087                 | -0,201        | to 0,141 | -0,345              | 0,730          | 3,990                | 564                                              | 211                                                |
| Pallidum           | 0,072                                                              | 0,086                 | -0,097        | to 0,241 | 0,832               | 0,406          | 0,000                | 544                                              | 203                                                |
| Hippocampus        | -0,050                                                             | 0,080                 | -0,207        | to 0,107 | -0,624              | 0,533          | 0,000                | 607                                              | 237                                                |
| Amygdala           | 0,000                                                              | 0,090                 | -0,176        | to 0,177 | 0,001               | 0,999          | 18,207               | 612                                              | 235                                                |
| Accumbens          | -0,042                                                             | 0,090                 | -0,218        | to 0,133 | -0,472              | 0,637          | 17,960               | 616                                              | 243                                                |
| ICV*               | 0,001                                                              | 0,079                 | -0,154        | to 0,155 | 0,007               | 0,995          | 0,004                | 632                                              | 246                                                |

Abbreviations: Obsessive Compulsive Disorder (OCD), Intracranial Volume (ICV), Confidence Interval (CI)

\* Controlled for age, sex and scan center

**Table S6A.** Full meta-analytic results for each mean structure for the adult OCD patients with a comorbid anxiety disorder versus controls comparison, controlling for age, sex, scan center, and ICV. Adjusted Cohen's d is reported.

|                    | <i>Cohen's d (comorbid anxiety OCD-HC)</i> | <i>Standard error</i> | <i>95% CI</i> |          | <i>% Difference</i> | <i>P-value</i> | <i>I2</i> | <i>Number of controls</i> | <i>Number of patients</i> |
|--------------------|--------------------------------------------|-----------------------|---------------|----------|---------------------|----------------|-----------|---------------------------|---------------------------|
| Lateral Ventricles | 0,152                                      | 0,155                 | -0,152        | to 0,455 | 0,977               | 0,329          | 54,046    | 419                       | 145                       |
| Thalamus           | -0,075                                     | 0,112                 | -0,296        | to 0,145 | -0,670              | 0,503          | 0,000     | 370                       | 114                       |
| Caudate            | 0,226                                      | 0,104                 | 0,023         | to 0,429 | 2,177               | 0,029          | 0,000     | 396                       | 137                       |
| Putamen            | 0,096                                      | 0,158                 | -0,213        | to 0,406 | 0,611               | 0,541          | 46,925    | 355                       | 120                       |
| Pallidum           | 0,110                                      | 0,117                 | -0,119        | to 0,340 | 0,941               | 0,346          | 6,981     | 357                       | 116                       |
| Hippocampus        | -0,067                                     | 0,103                 | -0,270        | to 0,135 | -0,651              | 0,515          | 0,002     | 400                       | 139                       |
| Amygdala           | 0,021                                      | 0,129                 | -0,232        | to 0,274 | 0,163               | 0,870          | 29,970    | 397                       | 134                       |
| Accumbens          | -0,022                                     | 0,102                 | -0,222        | to 0,179 | -0,213              | 0,831          | 0,001     | 406                       | 142                       |
| ICV*               | 0,109                                      | 0,111                 | -0,109        | to 0,327 | 0,982               | 0,326          | 14,778    | 419                       | 145                       |

Abbreviations: Obsessive Compulsive Disorder (OCD), Healthy Control (HC), Intracranial Volume (ICV), Confidence Interval (CI)

\* Controlled for age, sex and scan center

**Table S6B.** Full meta-analytic results for each mean structure for the adult OCD patients without a comorbid anxiety disorder versus controls comparison, controlling for age, sex, scan center, and ICV. Adjusted Cohen's d is reported.

|                    | <i>Cohen's d (no comorbid anxiety OCD-HC)</i> | <i>Standard error</i> | <i>95% CI</i> |                  | <i>% Difference</i> | <i>P-value</i>                | <i>I2</i>     | <i>Number of controls</i> | <i>Number of patients</i> |
|--------------------|-----------------------------------------------|-----------------------|---------------|------------------|---------------------|-------------------------------|---------------|---------------------------|---------------------------|
| Lateral Ventricles | 0,140                                         | 0,081                 | -0,019        | to 0,299         | 1,721               | 0,085                         | 67,503        | 1164                      | 1011                      |
| Thalamus           | -0,088                                        | 0,056                 | -0,197        | to 0,021         | -1,583              | 0,113                         | 27,721        | 1103                      | 963                       |
| Caudate            | 0,001                                         | 0,044                 | -0,086        | to 0,088         | 0,027               | 0,979                         | 0,009         | 1143                      | 989                       |
| Putamen            | -0,023                                        | 0,045                 | -0,111        | to 0,066         | -0,501              | 0,616                         | 0,005         | 1087                      | 966                       |
| <b>Pallidum</b>    | <b>0,167</b>                                  | <b>0,059</b>          | <b>0,051</b>  | <b>to 0,283</b>  | <b>2,827</b>        | <b>4,70 × 10<sup>-3</sup></b> | <b>33,462</b> | <b>1064</b>               | <b>943</b>                |
| <b>Hippocampus</b> | <b>-0,199</b>                                 | <b>0,052</b>          | <b>-0,301</b> | <b>to -0,096</b> | <b>-3,790</b>       | <b>1,51 × 10<sup>-4</sup></b> | <b>22,724</b> | <b>1150</b>               | <b>990</b>                |
| Amygdala           | -0,143                                        | 0,053                 | -0,246        | to -0,040        | -2,720              | 0,007                         | 22,810        | 1125                      | 996                       |
| Accumbens          | -0,070                                        | 0,050                 | -0,167        | to 0,027         | -1,406              | 0,160                         | 15,861        | 1150                      | 995                       |
| ICV*               | -0,029                                        | 0,062                 | -0,150        | to 0,092         | -0,474              | 0,635                         | 44,221        | 1168                      | 1013                      |

Abbreviations: Obsessive Compulsive Disorder (OCD), Healthy Control (HC), Intracranial Volume (ICV), Confidence Interval (CI)

\* Controlled for age, sex and scan center

**Table S6C.** Full meta-analytic results for each mean structure for the adult OCD patients with versus without a comorbid anxiety disorder comparison, controlling for age, sex, scan center, and ICV. Adjusted Cohen's d is reported.

|                    | <i>Cohen's d (comorbid anxiety- no comorbid anxiety OCD)</i> | <i>Standard error</i> | <i>95% CI</i> |                 | <i>% Difference</i> | <i>P-value</i>                | <i>I2</i>    | <i>Number of patients no comorbid anxiety</i> | <i>Number of patients with comorbid anxiety</i> |
|--------------------|--------------------------------------------------------------|-----------------------|---------------|-----------------|---------------------|-------------------------------|--------------|-----------------------------------------------|-------------------------------------------------|
| Lateral Ventricles | -0,066                                                       | 0,276                 | -0,606        | to -0,606       | -0,240              | 0,810                         | 72,769       | 319                                           | 83                                              |
| Thalamus           | -0,019                                                       | 0,160                 | -0,332        | to -0,332       | -0,121              | 0,904                         | 0,001        | 282                                           | 57                                              |
| Caudate            | 0,186                                                        | 0,143                 | -0,094        | to -0,094       | 1,304               | 0,192                         | 0,000        | 304                                           | 78                                              |
| Putamen            | 0,049                                                        | 0,147                 | -0,239        | to -0,239       | 0,334               | 0,738                         | 0,000        | 297                                           | 72                                              |
| Pallidum           | -0,105                                                       | 0,151                 | -0,401        | to -0,401       | -0,697              | 0,486                         | 0,000        | 284                                           | 69                                              |
| Hippocampus        | 0,221                                                        | 0,143                 | -0,059        | to -0,059       | 1,549               | 0,121                         | 0,000        | 309                                           | 79                                              |
| Amygdala           | 0,387                                                        | 0,263                 | -0,129        | to -0,129       | 1,471               | 0,141                         | 68,139       | 315                                           | 78                                              |
| Accumbens          | 0,053                                                        | 0,168                 | -0,276        | to -0,276       | 0,317               | 0,752                         | 27,951       | 312                                           | 82                                              |
| <b>ICV*</b>        | <b>0,412</b>                                                 | <b>0,147</b>          | <b>0,124</b>  | <b>to 0,124</b> | <b>2,802</b>        | <b>5,08 × 10<sup>-3</sup></b> | <b>8,133</b> | <b>319</b>                                    | <b>83</b>                                       |

Abbreviations: Obsessive Compulsive Disorder (OCD), Healthy Control (HC), Intracranial Volume (ICV), Confidence Interval (CI)

\* Controlled for age, sex and scan center

**Table S7A.** Full meta-analytic results for each mean structure for the adult early onset OCD patients versus controls comparison, controlling for age, sex, scan center, and ICV. Adjusted Cohen's d is reported.

|                    | <i>Cohen's d (early onset OCD - HC)</i> | <i>Standard error</i> | <i>95% CI</i> |                 | <i>% Difference</i> | <i>P-value</i>                | <i>I2</i>     | <i>Number of controls</i> | <i>Number of patients</i> |
|--------------------|-----------------------------------------|-----------------------|---------------|-----------------|---------------------|-------------------------------|---------------|---------------------------|---------------------------|
| Lateral Ventricles | 0,101                                   | 0,069                 | -0,035        | to 0,237        | 1,458               | 0,145                         | 45,058        | 1434                      | 623                       |
| Thalamus           | -0,009                                  | 0,051                 | -0,109        | to 0,091        | -0,176              | 0,861                         | 0,000         | 1355                      | 564                       |
| Caudate            | 0,108                                   | 0,050                 | 0,010         | to 0,206        | 2,157               | 0,031                         | 0,000         | 1392                      | 600                       |
| Putamen            | 0,084                                   | 0,056                 | -0,026        | to 0,195        | 1,490               | 0,136                         | 11,458        | 1304                      | 564                       |
| <b>Pallidum</b>    | <b>0,251</b>                            | <b>0,068</b>          | <b>0,118</b>  | <b>to 0,385</b> | <b>3,684</b>        | <b>2,30 × 10<sup>-4</sup></b> | <b>34,821</b> | <b>1280</b>               | <b>551</b>                |
| Hippocampus        | -0,078                                  | 0,068                 | -0,210        | to 0,055        | -1,145              | 0,252                         | 40,927        | 1408                      | 600                       |
| Amygdala           | -0,094                                  | 0,053                 | -0,197        | to 0,009        | -1,787              | 0,074                         | 7,456         | 1386                      | 605                       |
| Accumbens          | -0,047                                  | 0,050                 | -0,144        | to 0,051        | -0,942              | 0,346                         | 0,000         | 1414                      | 612                       |
| <b>ICV*</b>        | <b>0,026</b>                            | <b>0,055</b>          | <b>-0,081</b> | <b>to 0,133</b> | <b>0,471</b>        | <b>0,638</b>                  | <b>15,355</b> | <b>1437</b>               | <b>625</b>                |

Abbreviations: Obsessive Compulsive Disorder (OCD), Healthy Control (HC), Intracranial Volume (ICV), Confidence Interval (CI)

\* Controlled for age, sex and scan center

**Table S7B.** Full meta-analytic results for each mean structure for the adult late onset OCD patients versus controls comparison, controlling for age, sex, scan center, and ICV. Adjusted Cohen's d is reported.

|                    | <i>Cohen's d (late onset<br/>OCD – HC)</i> | <i>Standard error</i> | <i>95% CI</i> |           | <i>% Difference</i> | <i>P-value</i> | <i>I<sup>2</sup></i>          | <i>Number of<br/>controls</i> | <i>Number of<br/>patients</i> |            |
|--------------------|--------------------------------------------|-----------------------|---------------|-----------|---------------------|----------------|-------------------------------|-------------------------------|-------------------------------|------------|
| Lateral Ventricles | 0,143                                      | 0,063                 | 0,020         | to        | 0,266               | 2,280          | 0,023                         | 39,618                        | 1434                          | 793        |
| Thalamus           | -0,149                                     | 0,108                 | -0,360        | to        | 0,062               | -1,385         | 0,166                         | 78,203                        | 1355                          | 742        |
| Caudate            | -0,002                                     | 0,047                 | -0,093        | to        | 0,090               | -0,035         | 0,972                         | 0,000                         | 1392                          | 772        |
| Putamen            | -0,056                                     | 0,093                 | -0,238        | to        | 0,125               | -0,608         | 0,543                         | 69,002                        | 1304                          | 734        |
| Pallidum           | 0,120                                      | 0,064                 | -0,006        | to        | 0,246               | 1,865          | 0,062                         | 35,391                        | 1280                          | 723        |
| <b>Hippocampus</b> | <b>-0,181</b>                              | <b>0,054</b>          | <b>-0,286</b> | <b>to</b> | <b>-0,075</b>       | <b>-3,357</b>  | <b>7,87 × 10<sup>-4</sup></b> | <b>18,818</b>                 | <b>1408</b>                   | <b>772</b> |
| Amygdala           | -0,107                                     | 0,068                 | -0,240        | to        | 0,025               | -1,584         | 0,113                         | 46,389                        | 1386                          | 775        |
| Accumbens          | -0,035                                     | 0,046                 | -0,126        | to        | 0,056               | -0,759         | 0,448                         | 0,000                         | 1414                          | 780        |
| ICV*               | -0,041                                     | 0,048                 | -0,134        | to        | 0,053               | -0,852         | 0,394                         | 4,280                         | 1437                          | 793        |

Abbreviations: Obsessive Compulsive Disorder (OCD), Healthy Control (HC), Intracranial Volume (ICV), Confidence Interval (CI)

\* Controlled for age, sex and scan center

**Table S7C.** Full meta-analytic results for each mean structure for the adult late onset versus early onset OCD patients comparison, controlling for age, sex, scan center, and ICV. Adjusted Cohen's d is reported.

|                    | <i>Cohen's d (late –early<br/>onset OCD)</i> | <i>Standard error</i> | <i>95% CI</i> |    | <i>% Difference</i> | <i>P-value</i> | <i>I<sup>2</sup></i> | <i>Number of early<br/>onset patients</i> | <i>Number of late<br/>onset patients</i> |     |
|--------------------|----------------------------------------------|-----------------------|---------------|----|---------------------|----------------|----------------------|-------------------------------------------|------------------------------------------|-----|
| Lateral Ventricles | 0,038                                        | 0,052                 | -0,064        | to | 0,141               | 0,733          | 0,464                | 0,000                                     | 623                                      | 793 |
| Thalamus           | -0,091                                       | 0,056                 | -0,202        | to | 0,019               | -1,618         | 0,106                | 5,531                                     | 564                                      | 742 |
| Caudate            | -0,138                                       | 0,056                 | -0,247        | to | -0,029              | -2,480         | 0,013                | 6,761                                     | 600                                      | 772 |
| Putamen            | -0,081                                       | 0,055                 | -0,189        | to | 0,028               | -1,459         | 0,145                | 0,000                                     | 564                                      | 734 |
| Pallidum           | -0,091                                       | 0,074                 | -0,236        | to | 0,055               | -1,222         | 0,222                | 37,490                                    | 551                                      | 723 |
| Hippocampus        | -0,078                                       | 0,060                 | -0,195        | to | 0,039               | -1,300         | 0,194                | 16,703                                    | 600                                      | 772 |
| Amygdala           | -0,014                                       | 0,068                 | -0,147        | to | 0,118               | -0,211         | 0,833                | 33,651                                    | 605                                      | 775 |
| Accumbens          | -0,021                                       | 0,065                 | -0,148        | to | 0,106               | -0,326         | 0,745                | 27,944                                    | 612                                      | 780 |
| ICV*               | -0,060                                       | 0,052                 | -0,163        | to | 0,042               | -1,150         | 0,250                | 0,000                                     | 625                                      | 793 |

Abbreviations: Obsessive Compulsive Disorder (OCD), Healthy Control (HC), Intracranial Volume (ICV), Confidence Interval (CI)

\* Controlled for age, sex and scan center

**Table S8A.** Full meta-analytic results for each mean structure for the association between age of onset and brain volumes within adult OCD patients, controlling for age, sex, scan center, and intracranial volume. Correlation coefficient Pearson's *r* is reported.

|                    | <i>Pearson's<br/>r</i> | <i>Standard<br/>error</i> | <i>95% CI</i> |           | <i>% Difference</i> | <i>P-value</i> | <i>I<sup>2</sup></i> | <i>Number of<br/>patients</i> |
|--------------------|------------------------|---------------------------|---------------|-----------|---------------------|----------------|----------------------|-------------------------------|
| Lateral Ventricles | -0,006                 | 0,027                     | -0,060        | to 0,047  | -0,231              | 0,817          | 4,342                | 1415                          |
| Thalamus           | -0,023                 | 0,037                     | -0,097        | to 0,050  | -0,621              | 0,534          | 42,229               | 1304                          |
| Caudate            | -0,061                 | 0,027                     | -0,113        | to -0,008 | -2,269              | 0,023          | 0,008                | 1370                          |
| Putamen            | -0,009                 | 0,035                     | -0,077        | to 0,059  | -0,254              | 0,800          | 32,859               | 1296                          |
| Pallidum           | -0,056                 | 0,054                     | -0,162        | to 0,050  | -1,032              | 0,302          | 73,771               | 1272                          |
| Hippocampus        | -0,013                 | 0,028                     | -0,068        | to 0,041  | -0,485              | 0,628          | 4,396                | 1371                          |
| Amygdala           | 0,040                  | 0,027                     | -0,013        | to 0,092  | 1,488               | 0,137          | 0,000                | 1378                          |
| Accumbens          | 0,026                  | 0,034                     | -0,040        | to 0,092  | 0,764               | 0,445          | 33,090               | 1390                          |
| ICV*               | -0,010                 | 0,027                     | -0,064        | to 0,043  | -0,373              | 0,709          | 5,506                | 1416                          |

Abbreviations: Obsessive Compulsive Disorder (OCD), Healthy Control (HC), Intracranial Volume (ICV), Confidence Interval (CI)

\* Controlled for age, sex and scan center

**Table S8B.** Full meta-analytic results for each mean structure for the association between age of onset and brain volumes within pediatric OCD patients, controlling for age, sex, scan center, and ICV. Correlation coefficient Pearson's *r* is reported.

|                    | <i>Pearson's<br/>r</i> | <i>Standard<br/>error</i> | <i>95% CI</i> |          | <i>% Difference</i> | <i>P-value</i> | <i>I<sup>2</sup></i> | <i>Number of<br/>patients</i> |
|--------------------|------------------------|---------------------------|---------------|----------|---------------------|----------------|----------------------|-------------------------------|
| Lateral Ventricles | -0,104                 | 0,115                     | 0,115         | to 0,120 | -0,910              | 0,363          | 73,689               | 268                           |
| Thalamus           | -0,127                 | 0,067                     | 0,067         | to 0,004 | -1,907              | 0,057          | 12,371               | 250                           |
| Caudate            | -0,041                 | 0,093                     | 0,093         | to 0,143 | -0,434              | 0,665          | 55,470               | 251                           |
| Putamen            | -0,073                 | 0,104                     | 0,104         | to 0,132 | -0,699              | 0,485          | 62,938               | 236                           |
| Pallidum           | -0,088                 | 0,082                     | 0,082         | to 0,073 | -1,067              | 0,286          | 30,363               | 212                           |
| Hippocampus        | 0,021                  | 0,067                     | 0,067         | to 0,153 | 0,308               | 0,758          | 10,261               | 248                           |
| Amygdala           | -0,097                 | 0,066                     | 0,066         | to 0,032 | -1,474              | 0,141          | 0,017                | 222                           |
| Accumbens          | -0,159                 | 0,082                     | 0,082         | to 0,001 | -1,947              | 0,051          | 43,555               | 262                           |
| ICV*               | -0,064                 | 0,070                     | 0,070         | to 0,073 | -0,914              | 0,361          | 22,315               | 270                           |

Abbreviations: Obsessive Compulsive Disorder (OCD), Healthy Control (HC), Intracranial Volume (ICV), Confidence Interval (CI)

\* Controlled for age, sex and scan center

**Table S9A.** Full meta-analytic results for each mean structure for the association between disease duration and brain volumes within adult OCD patients, controlling for age, sex, scan center, and intracranial volume. Correlation coefficient Pearsons *r* is reported.

|                    | <i>Pearson's r</i> | <i>Standard error</i> | <i>95% CI</i> |          | <i>% Difference</i> | <i>P-value</i> | <i>I2</i> | <i>Number of patients</i> |
|--------------------|--------------------|-----------------------|---------------|----------|---------------------|----------------|-----------|---------------------------|
| Lateral Ventricles | 0,007              | 0,028                 | -0,049        | to 0,062 | 0,238               | 0,812          | 9,897     | 1415                      |
| Thalamus           | 0,022              | 0,038                 | -0,052        | to 0,096 | 0,584               | 0,559          | 43,706    | 1304                      |
| Caudate            | 0,069              | 0,029                 | 0,013         | to 0,125 | 2,417               | 0,016          | 9,859     | 1370                      |
| Putamen            | 0,007              | 0,036                 | -0,063        | to 0,077 | 0,200               | 0,842          | 36,018    | 1296                      |
| Pallidum           | 0,072              | 0,047                 | -0,021        | to 0,165 | 1,526               | 0,127          | 64,415    | 1272                      |
| Hippocampus        | 0,005              | 0,028                 | -0,051        | to 0,060 | 0,171               | 0,864          | 7,681     | 1371                      |
| Amygdala           | -0,037             | 0,027                 | -0,089        | to 0,016 | -1,379              | 0,168          | 0,000     | 1378                      |
| Accumbens          | -0,018             | 0,033                 | -0,084        | to 0,048 | -0,538              | 0,590          | 32,677    | 1390                      |
| ICV*               | 0,014              | 0,026                 | -0,038        | to 0,066 | 0,532               | 0,595          | 0,005     | 1416                      |

Abbreviations: Obsessive Compulsive Disorder (OCD), Healthy Control (HC), Intracranial Volume (ICV), Confidence Interval (CI)

\* Controlled for age, sex and scan center

**Table S9B.** Full meta-analytic results for each mean structure for the association between disease duration and brain volumes within pediatric OCD patients, controlling for age, sex, scan center, and ICV. Correlation coefficient Pearsons *r* is reported.

|                    | <i>Pearson's r</i> | <i>Standard error</i> | <i>95% CI</i> |          | <i>% Difference</i> | <i>P-value</i> | <i>I2</i> | <i>Number of patients</i> |
|--------------------|--------------------|-----------------------|---------------|----------|---------------------|----------------|-----------|---------------------------|
| Lateral Ventricles | 0,093              | 0,115                 | -0,132        | to 0,318 | 0,812               | 0,417          | 73,702    | 268                       |
| Thalamus           | 0,128              | 0,067                 | -0,004        | to 0,259 | 1,896               | 0,058          | 14,211    | 250                       |
| Caudate            | 0,026              | 0,097                 | -0,165        | to 0,217 | 0,264               | 0,792          | 59,487    | 251                       |
| Putamen            | 0,052              | 0,121                 | -0,185        | to 0,290 | 0,433               | 0,665          | 73,700    | 236                       |
| Pallidum           | 0,079              | 0,083                 | -0,083        | to 0,241 | 0,951               | 0,342          | 31,211    | 212                       |
| Hippocampus        | -0,023             | 0,067                 | -0,154        | to 0,109 | -0,336              | 0,737          | 9,823     | 248                       |
| Amygdala           | 0,087              | 0,066                 | -0,042        | to 0,216 | 1,319               | 0,187          | 0,007     | 222                       |
| Accumbens          | 0,165              | 0,081                 | 0,006         | to 0,324 | 2,033               | 0,042          | 42,944    | 262                       |
| ICV*               | 0,060              | 0,069                 | -0,076        | to 0,195 | 0,860               | 0,390          | 20,195    | 270                       |

Abbreviations: Obsessive Compulsive Disorder (OCD), Healthy Control (HC), Intracranial Volume (ICV), Confidence Interval (CI)

\* Controlled for age, sex and scan center

**Table S10.** Full meta-analytic results for each mean structure for the association between symptom severity and brain volumes within OCD patients based on the YBOCS, controlling for age, sex, scan center, and intracranial volume. Correlation coefficient Pearsons *r* is reported.

|                    | <i>Pearson's<br/>r</i> | <i>Standard<br/>error</i> | <i>95% CI</i> |           | <i>% Difference</i> | <i>P-value</i> | <i>I2</i> | <i>Number of<br/>patients</i> |
|--------------------|------------------------|---------------------------|---------------|-----------|---------------------|----------------|-----------|-------------------------------|
| Lateral Ventricles | 0,046                  | 0,027                     | -0,007        | to 0,098  | 1,684               | 0,092          | 3,687     | 1419                          |
| Thalamus           | -0,050                 | 0,037                     | -0,123        | to 0,022  | -1,354              | 0,176          | 40,978    | 1309                          |
| Caudate            | -0,052                 | 0,028                     | -0,108        | to 0,003  | -1,843              | 0,065          | 8,237     | 1371                          |
| Putamen            | -0,065                 | 0,027                     | -0,119        | to -0,011 | -2,374              | 0,018          | 0,000     | 1306                          |
| Pallidum           | -0,035                 | 0,035                     | -0,103        | to 0,033  | -1,005              | 0,315          | 30,374    | 1276                          |
| Hippocampus        | -0,066                 | 0,030                     | -0,124        | to -0,008 | -2,218              | 0,027          | 15,668    | 1375                          |
| Amygdala           | -0,036                 | 0,033                     | -0,100        | to 0,028  | -1,110              | 0,267          | 28,320    | 1383                          |
| Accumbens          | -0,019                 | 0,027                     | -0,073        | to 0,034  | -0,718              | 0,473          | 2,997     | 1395                          |
| ICV                | -0,056                 | 0,033                     | -0,122        | to 0,009  | -1,684              | 0,092          | 33,364    | 1421                          |

Abbreviations: Obsessive Compulsive Disorder (OCD), Healthy Control (HC), Intracranial Volume (ICV), Confidence Interval (CI), Yale Brown Obsessive Compulsive Scale (YBOCS)

\* Controlled for age, sex and scan center

**Table S11.** Full meta-analytic results for each mean structure for the association between symptom severity and brain volumes within pediatric OCD patients based on the CYBOCS, controlling for age, sex, scan center, and ICV. Correlation coefficient Pearsons *r* is reported.

|                    | <i>Pearson's<br/>r</i> | <i>Standard<br/>error</i> | <i>95% CI</i> |          | <i>% Difference</i> | <i>P-value</i> | <i>I2</i> | <i>Number of<br/>patients</i> |
|--------------------|------------------------|---------------------------|---------------|----------|---------------------|----------------|-----------|-------------------------------|
| Lateral Ventricles | 0,072                  | 0,057                     | -0,039        | to 0,184 | 1,269               | 0,204          | 0,000     | 307                           |
| Thalamus           | 0,025                  | 0,059                     | -0,090        | to 0,140 | 0,430               | 0,667          | 0,000     | 291                           |
| Caudate            | 0,099                  | 0,067                     | -0,032        | to 0,230 | 1,483               | 0,138          | 23,750    | 292                           |
| Putamen            | 0,055                  | 0,082                     | -0,105        | to 0,215 | 0,674               | 0,500          | 46,549    | 286                           |
| Pallidum           | 0,008                  | 0,062                     | -0,114        | to 0,130 | 0,128               | 0,898          | 0,000     | 257                           |
| Hippocampus        | 0,093                  | 0,066                     | -0,036        | to 0,222 | 1,410               | 0,159          | 18,850    | 287                           |
| Amygdala           | 0,113                  | 0,076                     | -0,035        | to 0,261 | 1,496               | 0,135          | 35,095    | 260                           |
| Accumbens          | -0,059                 | 0,058                     | -0,172        | to 0,055 | -1,015              | 0,310          | 3,896     | 302                           |
| ICV                | -0,073                 | 0,073                     | -0,216        | to 0,070 | -1,005              | 0,315          | 38,830    | 311                           |

Abbreviations: Obsessive Compulsive Disorder (OCD), Healthy Control (HC), Intracranial Volume (ICV), Confidence Interval (CI), Children's Yale Brown Obsessive Compulsive Scale (CYBOCS)

\* Controlled for age, sex and scan center



**Table S12.** Full results from the moderator analyses in the adult samples of mean age, field strength of scanner, percent of medicated patients, percent of patients taking SSRIs, percent of patients taking antipsychotics, percent comorbid anxiety, and percent comorbid depression. The table is split into two parts to fit on a single page for easier comparison.

|                    | <i>Mean age</i>        |                       |                | <i>Field strength</i>  |                       |                | <i>Percent with a comorbid depression</i> |                       |                | <i>Percent with a comorbid anxiety disorder</i> |                       |                |
|--------------------|------------------------|-----------------------|----------------|------------------------|-----------------------|----------------|-------------------------------------------|-----------------------|----------------|-------------------------------------------------|-----------------------|----------------|
|                    | <i>Beta</i>            | <i>Standard error</i> | <i>P-value</i> | <i>Beta</i>            | <i>Standard error</i> | <i>P-value</i> | <i>Beta</i>                               | <i>Standard error</i> | <i>P-value</i> | <i>Beta</i>                                     | <i>Standard error</i> | <i>P-value</i> |
| Lateral Ventricles | $1.02 \times 10^{-2}$  | 0.015                 | 0.498          | $1.21 \times 10^{-1}$  | 0.129                 | 0.347          | $1.49 \times 10^{-3}$                     | 0.007                 | 0.826          | $1.49 \times 10^{-3}$                           | 0.007                 | 0.826          |
| Thalamus           | $-2.01 \times 10^{-2}$ | 0.010                 | 0.036          | $-3.56 \times 10^{-2}$ | 0.090                 | 0.692          | $-1.07 \times 10^{-2}$                    | 0.005                 | 0.036          | $-1.07 \times 10^{-2}$                          | 0.005                 | 0.036          |
| Caudate            | $-1.93 \times 10^{-2}$ | 0.009                 | 0.041          | $3.99 \times 10^{-2}$  | 0.079                 | 0.612          | $-9.44 \times 10^{-3}$                    | 0.005                 | 0.041          | $-9.44 \times 10^{-3}$                          | 0.005                 | 0.041          |
| Putamen            | $1.69 \times 10^{-2}$  | 0.010                 | 0.104          | $2.43 \times 10^{-2}$  | 0.093                 | 0.793          | $5.32 \times 10^{-3}$                     | 0.005                 | 0.314          | $5.32 \times 10^{-3}$                           | 0.005                 | 0.314          |
| Pallidum           | $5.63 \times 10^{-3}$  | 0.012                 | 0.650          | $4.85 \times 10^{-2}$  | 0.106                 | 0.647          | $-2.47 \times 10^{-3}$                    | 0.006                 | 0.688          | $-2.47 \times 10^{-3}$                          | 0.006                 | 0.688          |
| Hippocampus        | $-1.43 \times 10^{-2}$ | 0.012                 | 0.215          | $-9.85 \times 10^{-3}$ | 0.100                 | 0.922          | $1.22 \times 10^{-3}$                     | 0.005                 | 0.816          | $1.22 \times 10^{-3}$                           | 0.005                 | 0.816          |
| Amygdala           | $-1.69 \times 10^{-4}$ | 0.012                 | 0.989          | $3.60 \times 10^{-2}$  | 0.105                 | 0.731          | $2.07 \times 10^{-3}$                     | 0.006                 | 0.726          | $2.07 \times 10^{-3}$                           | 0.006                 | 0.726          |
| Accumbens          | $6.87 \times 10^{-4}$  | 0.010                 | 0.945          | $1.81 \times 10^{-2}$  | 0.084                 | 0.829          | $7.30 \times 10^{-3}$                     | 0.005                 | 0.118          | $7.30 \times 10^{-3}$                           | 0.005                 | 0.118          |
| ICV                | $-2.63 \times 10^{-2}$ | 0.011                 | 0.012          | $4.33 \times 10^{-2}$  | 0.101                 | 0.667          | $-3.59 \times 10^{-3}$                    | 0.006                 | 0.523          | $-3.59 \times 10^{-3}$                          | 0.006                 | 0.523          |

  

|                    | <i>Percent on SSRIs</i> |                       |                | <i>Percent on antipsychotics</i> |                       |                |
|--------------------|-------------------------|-----------------------|----------------|----------------------------------|-----------------------|----------------|
|                    | <i>Beta</i>             | <i>Standard error</i> | <i>P-value</i> | <i>Beta</i>                      | <i>Standard error</i> | <i>P-value</i> |
| Lateral Ventricles | $2.77 \times 10^{-3}$   | 0.005                 | 0.542          | $-2.03 \times 10^{-3}$           | 0.005                 | 0.703          |
| Thalamus           | $-7.27 \times 10^{-3}$  | 0.003                 | 0.027          | $-1.61 \times 10^{-3}$           | 0.004                 | 0.712          |
| Caudate            | $3.71 \times 10^{-4}$   | 0.003                 | 0.910          | $-2.21 \times 10^{-3}$           | 0.004                 | 0.563          |
| Putamen            | $-1.97 \times 10^{-4}$  | 0.005                 | 0.967          | $-1.03 \times 10^{-3}$           | 0.006                 | 0.856          |
| Pallidum           | $-2.01 \times 10^{-3}$  | 0.004                 | 0.623          | $6.26 \times 10^{-3}$            | 0.005                 | 0.179          |
| Hippocampus        | $-1.75 \times 10^{-3}$  | 0.005                 | 0.713          | $-9.47 \times 10^{-3}$           | 0.005                 | 0.037          |
| Amygdala           | $-2.43 \times 10^{-3}$  | 0.005                 | 0.604          | $1.28 \times 10^{-3}$            | 0.005                 | 0.981          |
| Accumbens          | $-2.80 \times 10^{-3}$  | 0.005                 | 0.544          | $-6.45 \times 10^{-3}$           | 0.005                 | 0.233          |
| ICV                | $-4.45 \times 10^{-3}$  | 0.003                 | 0.168          | $1.02 \times 10^{-3}$            | 0.004                 | 0.778          |

Abbreviations: Intracranial Volume (ICV)

**Table S13.** Full results from the moderator analyses in the pediatric samples of mean age and field strength of scanner.

|                    | <i>Mean age</i>        |                       |                | <i>Field strength</i>  |                       |                |
|--------------------|------------------------|-----------------------|----------------|------------------------|-----------------------|----------------|
|                    | <i>Beta</i>            | <i>Standard error</i> | <i>P-value</i> | <i>Beta</i>            | <i>Standard error</i> | <i>P-value</i> |
| Lateral Ventricles | -2.29E-02              | 0.121                 | 0.849          | $1.04 \times 10^{-1}$  | 0.354                 | 0.769          |
| Thalamus           | $1.70 \times 10^{-3}$  | 0.111                 | 0.125          | $8.98 \times 10^{-3}$  | 0.369                 | 0.981          |
| Caudate            | $2.35 \times 10^{-2}$  | 0.111                 | 0.833          | $7.94 \times 10^{-2}$  | 0.322                 | 0.805          |
| Putamen            | $-9.10 \times 10^{-2}$ | 0.126                 | 0.470          | $-3.15 \times 10^{-1}$ | 0.332                 | 0.343          |
| Pallidum           | $2.34 \times 10^{-1}$  | 0.178                 | 0.187          | $1.63 \times 10^{-1}$  | 0.534                 | 0.760          |
| Hippocampus        | $-1.74 \times 10^{-1}$ | 0.097                 | 0.073          | $-3.47 \times 10^{-1}$ | 0.297                 | 0.243          |
| Amygdala           | $-3.34 \times 10^{-1}$ | 0.151                 | 0.027          | $-7.29 \times 10^{-1}$ | 0.547                 | 0.182          |
| Accumbens          | $-2.18 \times 10^{-1}$ | 0.098                 | 0.026          | $-4.85 \times 10^{-1}$ | 0.296                 | 0.101          |
| ICV                | $-1.18 \times 10^{-1}$ | 0.106                 | 0.263          | $1.56 \times 10^{-1}$  | 0.357                 | 0.965          |

Abbreviations: Intracranial Volume (ICV)

**Table S14.** Significant ( $P < 5.6 \times 10^{-3}$ ) results of the adult mega-analysis of subcortical brain volumes. The standardized beta is reported in case of group comparisons; Pearson's correlation coefficient  $r$  is reported in case of continuous variables. Analyses are controlled for age, sex, scan center and ICV.

|                              | # subjects<br>n=2967 |      | Lateral Ventricle |                       | Thalamus    | Caudate     | Putamen            |                       | Pallidum    |                       | Hippocampus |                       | Amygdala    | Accumbens   | ICV         |
|------------------------------|----------------------|------|-------------------|-----------------------|-------------|-------------|--------------------|-----------------------|-------------|-----------------------|-------------|-----------------------|-------------|-------------|-------------|
|                              | OCD                  | HC   | $\beta$           | $P$ -value            |             |             | $\beta$            | $P$ -value            | $\beta$     | $P$ -value            | $\beta$     | $P$ -value            |             |             |             |
| OCD vs HC                    | 1495                 | 1472 | 0.06              | $5.86 \times 10^{-4}$ | <i>n.s.</i> | <i>n.s.</i> | <i>n.s.</i>        |                       | 0.06        | $1.02 \times 10^{-4}$ | -0.05       | $4.66 \times 10^{-4}$ | <i>n.s.</i> | <i>n.s.</i> | <i>n.s.</i> |
| Med vs HC                    | 654                  | 1472 | 0.11              | $1.15 \times 10^{-7}$ | <i>n.s.</i> | <i>n.s.</i> | <i>n.s.</i>        |                       | 0.09        | $5.50 \times 10^{-7}$ | -0.09       | $1.99 \times 10^{-7}$ | <i>n.s.</i> | <i>n.s.</i> | <i>n.s.</i> |
| Non-med vs Med               | 821                  | 654  | 0.10              | $1.06 \times 10^{-3}$ | <i>n.s.</i> | <i>n.s.</i> | <i>n.s.</i>        |                       | <i>n.s.</i> |                       | <i>n.s.</i> |                       | <i>n.s.</i> | <i>n.s.</i> | <i>n.s.</i> |
| Early-onset vs HC            | 626                  | 1472 |                   | <i>n.s.</i>           | <i>n.s.</i> | <i>n.s.</i> | <i>n.s.</i>        |                       | 0.08        | $8.42 \times 10^{-6}$ |             | <i>n.s.</i>           | <i>n.s.</i> | <i>n.s.</i> | <i>n.s.</i> |
| Late-onset vs HC             | 794                  | 1472 | 0.06              | $1.30 \times 10^{-3}$ | <i>n.s.</i> | <i>n.s.</i> | <i>n.s.</i>        |                       | <i>n.s.</i> |                       | -0.06       | $8.23 \times 10^{-5}$ | <i>n.s.</i> | <i>n.s.</i> | <i>n.s.</i> |
|                              |                      |      |                   |                       |             |             | <i>Pearson's r</i> |                       |             |                       |             |                       |             |             |             |
| Disease Severity (YBOCS)     |                      | 1455 |                   | <i>n.s.</i>           | <i>n.s.</i> | <i>n.s.</i> | -0.08              | $3.38 \times 10^{-3}$ | <i>n.s.</i> |                       | <i>n.s.</i> |                       | <i>n.s.</i> | <i>n.s.</i> | <i>n.s.</i> |
|                              |                      |      | $\beta$           |                       |             |             |                    |                       |             |                       |             |                       |             |             |             |
| No Lifetime Anxiety vs HC    | 1002                 | 1472 | 0.07              | $1.71 \times 10^{-4}$ | <i>n.s.</i> | <i>n.s.</i> | <i>n.s.</i>        |                       | 0.05        | $9.12 \times 10^{-4}$ | -0.06       | $1.45 \times 10^{-4}$ | <i>n.s.</i> | <i>n.s.</i> | <i>n.s.</i> |
| Lifetime Depression vs HC    | 325                  | 1472 | 0.09              | $5.31 \times 10^{-5}$ | <i>n.s.</i> | <i>n.s.</i> | <i>n.s.</i>        |                       | <i>n.s.</i> |                       | -0.07       | $2.75 \times 10^{-4}$ | <i>n.s.</i> | <i>n.s.</i> | <i>n.s.</i> |
| No Lifetime Depression vs HC | 1041                 | 1472 | 0.06              | $1.94 \times 10^{-3}$ | <i>n.s.</i> | <i>n.s.</i> | <i>n.s.</i>        |                       | 0.07        | $4.74 \times 10^{-6}$ | -0.05       | $9.71 \times 10^{-4}$ | <i>n.s.</i> | <i>n.s.</i> | <i>n.s.</i> |

Abbreviations: Obsessive-Compulsive Disorder (OCD), Healthy Control (HC), Medicated OCD patients (Med), Unmedicated OCD patients (No Med), Early-onset OCD patients (Early-onset), Late-onset OCD patients (Late-onset), Yale Brown Obsessive Compulsive Scale (YBOCS), OCD patients without a comorbid lifetime anxiety diagnosis (No Lifetime Anxiety), OCD patients with a comorbid lifetime depression diagnosis (Lifetime Depression), OCD patients without a comorbid lifetime depression diagnosis (No Lifetime Depression), Intracranial Volume (ICV).

**Table S15.** Significant ( $P < 5.6 \times 10^{-3}$ ) results of the pediatric mega-analysis of subcortical brain volumes. The standardized beta is reported. Analyses are controlled for age (or age squared if listed), sex, scan center and ICV.

|                              | #subjects n=622 |     | <b>Lateral Ventricle</b> |                       | <b>Thalamus</b> |                       | Caudate     | Putamen     | Pallidum    | Hippocampus | Amygdala    | Accumbens   | ICV         |
|------------------------------|-----------------|-----|--------------------------|-----------------------|-----------------|-----------------------|-------------|-------------|-------------|-------------|-------------|-------------|-------------|
|                              | OCD             | HC  | $\beta$                  | <i>P-value</i>        | $\beta$         | <i>P-value</i>        |             |             |             |             |             |             |             |
| OCD vs HC                    | 335             | 287 | <i>n.s.</i>              |                       | 0.08            | $5.68 \times 10^{-3}$ | <i>n.s.</i> |
| OCD vs HC (ageSQ)            | 335             | 287 | <i>n.s.</i>              |                       | 0.08            | $5.47 \times 10^{-3}$ | <i>n.s.</i> |
| Med vs HC                    | 170             | 287 | 0.14                     | $1.97 \times 10^{-3}$ | <i>n.s.</i>     |                       | <i>n.s.</i> |
| Med vs No Med                | 170             | 159 | 0.19                     | $1.59 \times 10^{-3}$ | <i>n.s.</i>     |                       | <i>n.s.</i> |
| No Lifetime Anxiety vs HC    | 109             | 287 | <i>n.s.</i>              |                       | 0.11            | $9.60 \times 10^{-4}$ | <i>n.s.</i> |
| No Lifetime Depression vs HC | 34              | 287 | <i>n.s.</i>              |                       | 0.09            | $2.16 \times 10^{-3}$ | <i>n.s.</i> |

Abbreviations: Obsessive-Compulsive Disorder (OCD), Healthy Control (HC), Age Squared (ageSQ), Medicated OCD patients (Med), Unmedicated OCD patients (No Med), OCD patients without a comorbid lifetime anxiety diagnosis (No Lifetime Anxiety), OCD patients without a comorbid lifetime depression diagnosis (N
